# Supplementary material for: Consumers Respond Positively to the Sensory, Health, and Sustainability Benefits of the Rare Sugar Allulose in Yogurt Formulations
Source: MDPI journal article supplement (doi:10.3390/foods11223718), 2022-11-19
Supplement: s1 [file s1]

## Supplementary Materials

**Table S1. Panel demographics.**

| <b>Gender</b> | <b>Age<br/>(Years)</b> | <b>Dietary<br/>Preferences</b> | <b>Frequency of<br/>Consumption of<br/>Alternative<br/>Sweeteners</b> | <b>Preference for Natural<br/>Foods</b>                                                |
|---------------|------------------------|--------------------------------|-----------------------------------------------------------------------|----------------------------------------------------------------------------------------|
| 69%<br>female | 29.2 ± 9.5             | 5%, clean<br>label             | 9%, daily                                                             | 26%, care that the food<br>they consume is natural                                     |
| 31%<br>male   |                        | 6%,<br>sustainable             | 11%, more than 3 times<br>a week                                      | 31%, care that foods do<br>not contain artificial<br>ingredients                       |
|               |                        | 17%, high<br>protein           | 16%, 2-3 times a week                                                 | 33%, do not care about<br>artificial ingredients and/or<br>are indifferent to labeling |
|               |                        |                                | 16%, once a week                                                      |                                                                                        |
|               |                        |                                | 17%, once a month                                                     |                                                                                        |
|               |                        |                                | 31%, never                                                            |                                                                                        |

Gender, dietary preferences, consumption frequency, and natural foods preference are expressed as percent. Age is expressed as the mean in number of years old with standard deviation.

**Table S2. Open-ended comments of attributes.**

| <b>Sweetener</b> | <b>Bitterness</b> | <b>Artificial Taste</b> | <b>Astringent/Drying</b> | <b>Sour/Tangy</b> | <b>Vanilla</b> |
|------------------|-------------------|-------------------------|--------------------------|-------------------|----------------|
| Sucrose          | 6                 | 3                       | 2                        | 9                 | 4              |
| Allulose         | 7                 | 0                       | 6                        | 19                | 8              |
| Sucralose        | 10                | 8                       | 8                        | 10                | 11             |
| Stevia (Reb A)   | 15                | 15                      | 6                        | 28                | 1              |

**Table S3. Changes in purchase intent**

|       | Sucrose |       | Allulose |       | Stevia |       | Sucralose |       |
|-------|---------|-------|----------|-------|--------|-------|-----------|-------|
| Score | Before  | After | Before   | After | Before | After | Before    | After |
| 1     | 2       | 19    | 5        | 1     | 17     | 10    | 5         | 16    |
| 2     | 19      | 27    | 8        | 4     | 28     | 16    | 28        | 18    |
| 3     | 18      | 47    | 27       | 32    | 27     | 41    | 27        | 36    |
| 4     | 45      | 5     | 42       | 37    | 25     | 20    | 31        | 17    |
| 5     | 16      | 2     | 18       | 26    | 3      | 13    | 9         | 13    |

Purchase intent of the 100 participants was first compiled based on initial sensory preferences of the samples without disclosure of the sweetener used. Following a purchase intent preference, the participants were given information about the specific sweetener, how it would show on a nutritional label, whether it is natural or not as well as its potential source. Participants were asked to score their purchase intent again after receiving that information. In the scoring process, 1=Definitely would not purchase, 2=Probably would not purchase, 3=May or may not purchase, 4=Probably would purchase, 5=Definitely would purchase.
